# Supplementary material
Source: Springer Nature journal article supplement (https://www.springermedizin.de/resource/supplementary/12882_2012_480_MOESM4_ESM.pdf/9454182)

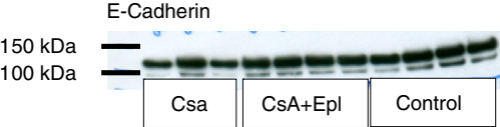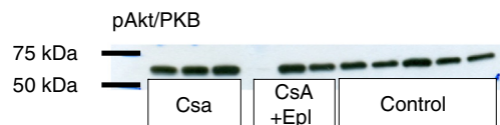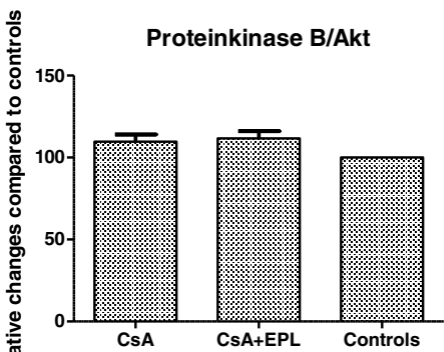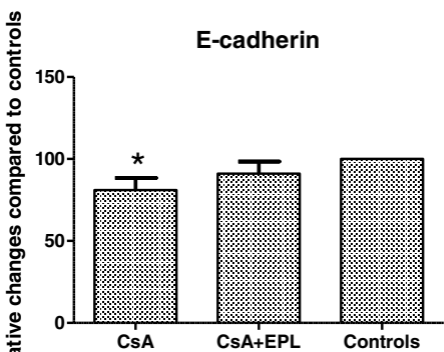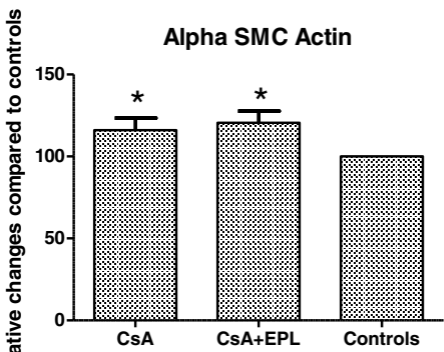

Supplement: MOESM4 [file 9454182]
